# Supplementary material
Source: MDPI journal article supplement (https://www.mdpi.com/2504-477X/3/2/37)
Supplement: s1 [file s1]

# Supplementary Materials: Preparation of Piezo-Resistive Materials by Combination of PP, SEBS and Graphene

Helga Seyler, Marián A. Gómez-Fatou and Horacio J. Salavagione

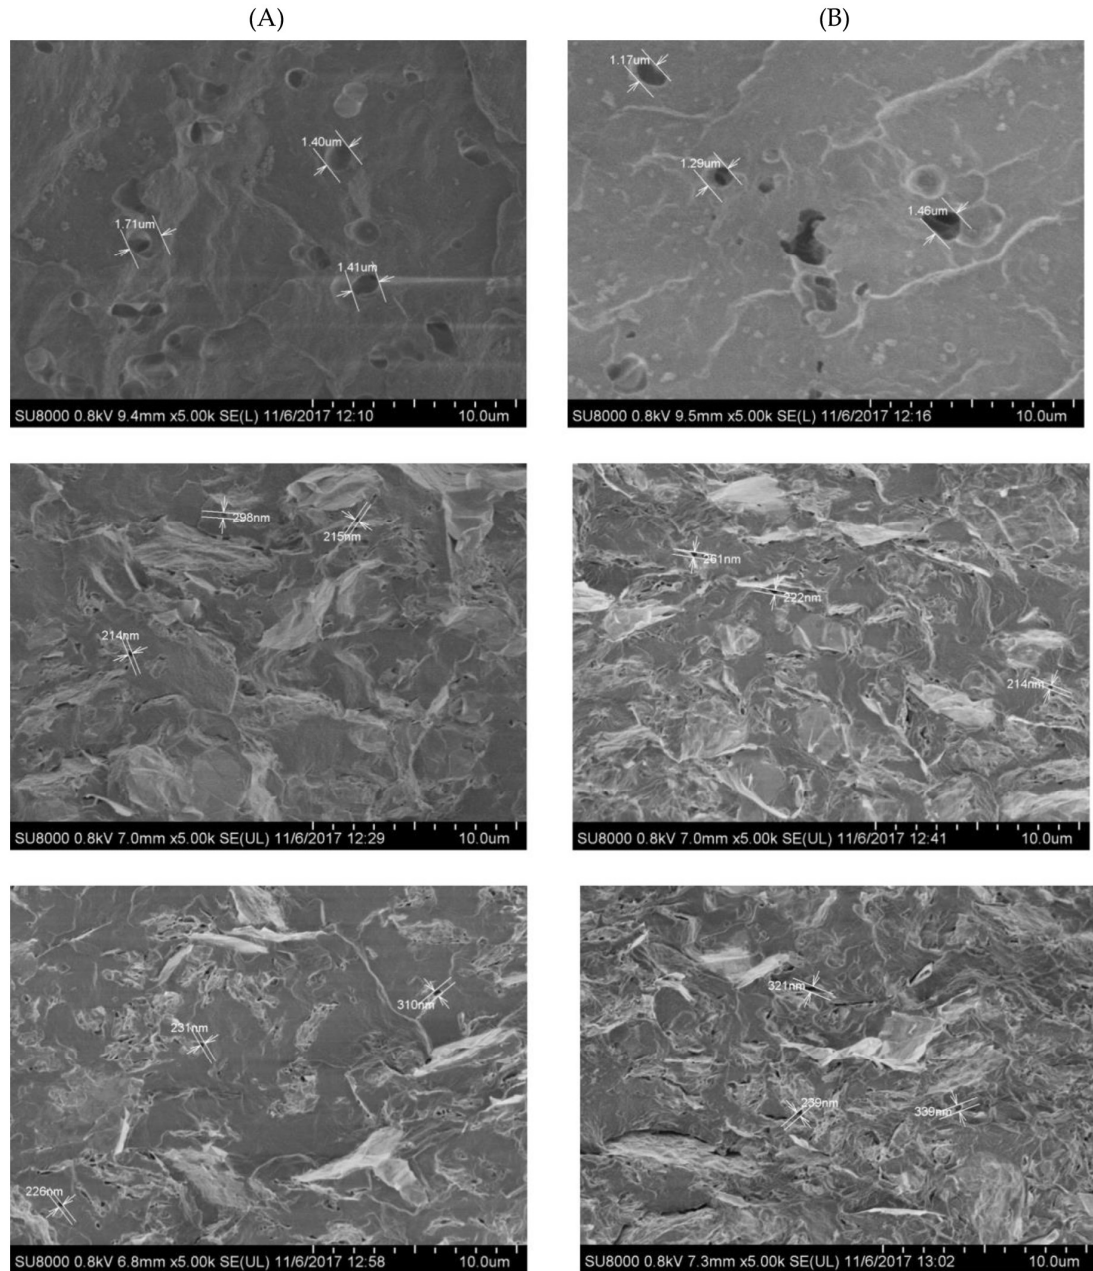

**Figure S1.** SEM images of cryo-fractured samples. The SEBS domains were dissolved in Xylene. (Top) iPP/SEBS; (middle) iPP/SEBS/G; (bottom) iPP/SEBS/GPP prepared via (A) SoM and (B) SoM/SSM route.

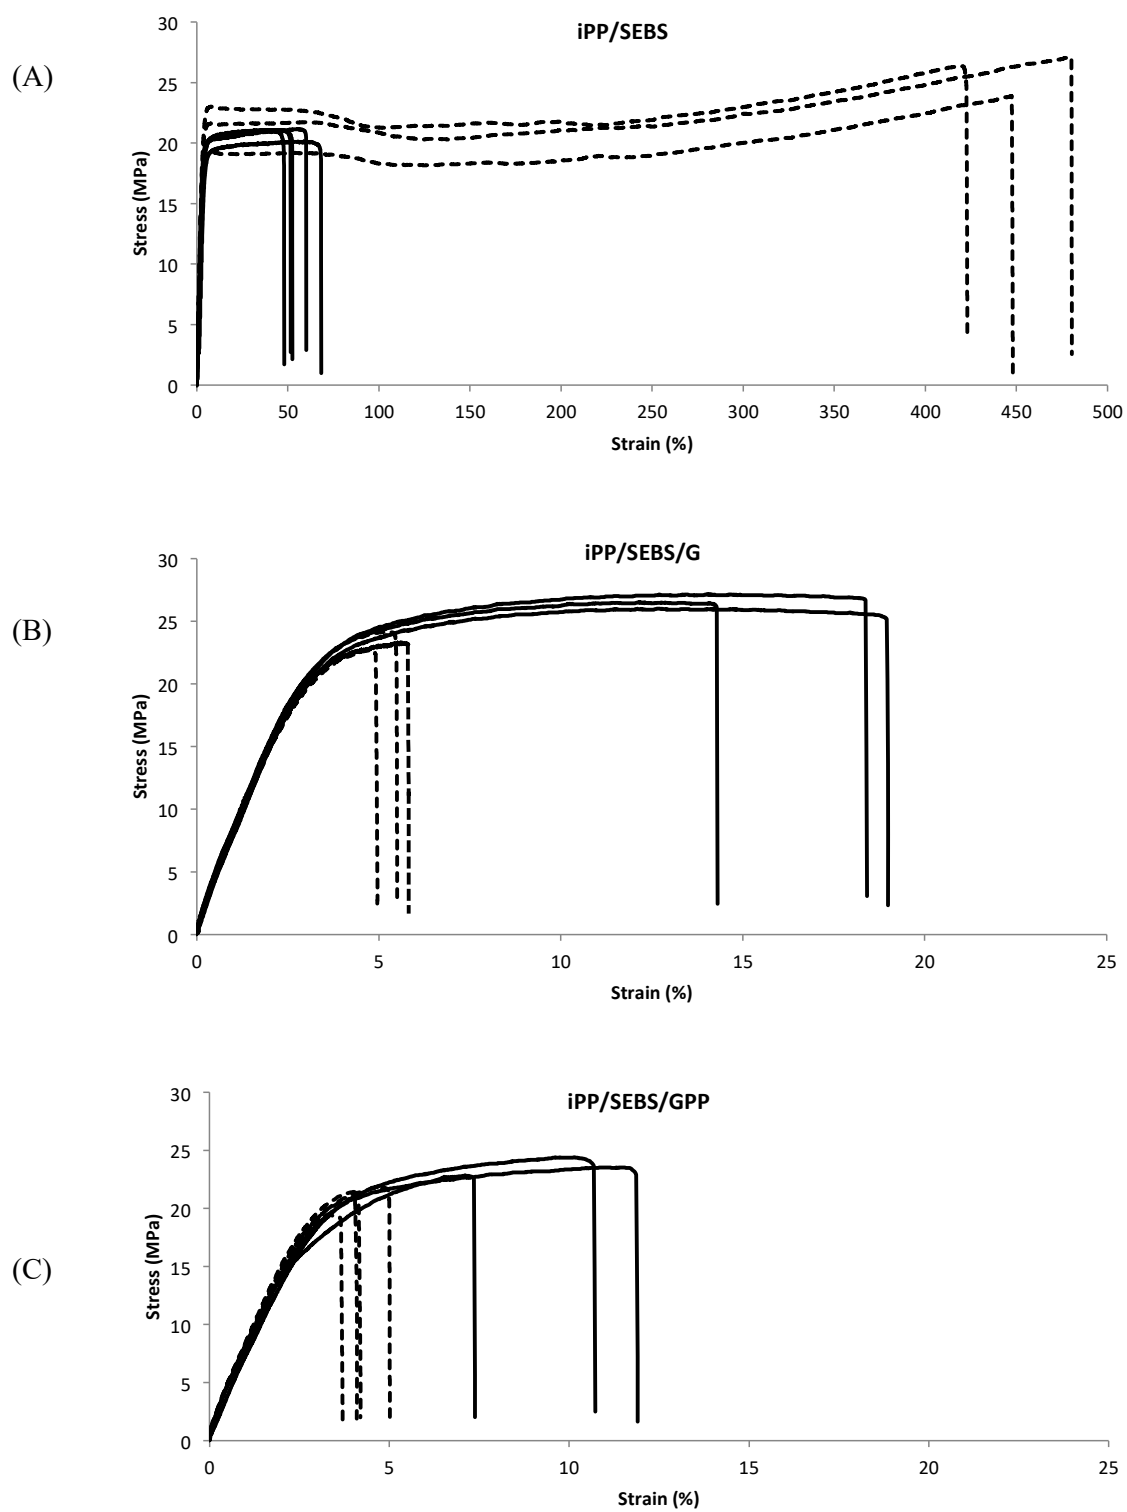

**Figure S2.** Comparison of mechanical response (tensile testing) of the blank samples (A) and nanocomposites (B) and (C). Route 1: dotted lines, Route 2: continuous lines.
